# Supplementary material for: A Study and Modeling of Bifidobacterium and Bacillus Coculture Continuous Fermentation under Distal Intestine Simulated Conditions
Source: MDPI journal article supplement (doi:10.3390/microorganisms10050929), 2022-04-28
Supplement: s1 [file s1]

**Table S1.** The concentration of carbohydrates during continuous cultivation of *Bifidobacterium adolescentis* at OF concentration of 7 mg mL<sup>-1</sup>.

| Time<br>h | Fructose<br>μg mL <sup>-1</sup> | Glucose<br>μg mL <sup>-1</sup> | Sucrose<br>μg mL <sup>-1</sup> | Sum of fructans<br>μg mL <sup>-1</sup> | Number of<br>homologs |
|-----------|---------------------------------|--------------------------------|--------------------------------|----------------------------------------|-----------------------|
| 0         | 1302                            | 71.42                          | 373.9                          | 1747.32                                | 8                     |
| 2         | 1275                            | -                              | 121.1                          | 1396.1                                 | 6                     |
| 14        | 55.12                           | -                              | -                              | 55.12                                  | 3                     |
| 23        | -                               | -                              | 46.29                          | 46.29                                  | 1                     |
| 54        | 34.96                           | -                              | -                              | 34.96                                  | 3                     |
| 75        | 8.975                           | -                              | -                              | 8.975                                  | 4                     |

**Table S2.** The concentration of carbohydrates during continuous cultivation of *Bifidobacterium adolescentis* at OF concentration of 12 mg mL<sup>-1</sup>.

| Time<br>h | Fructose<br>μg mL <sup>-1</sup> | Glucose<br>μg mL <sup>-1</sup> | Sucrose<br>μg mL <sup>-1</sup> | Sum of fructans<br>μg mL <sup>-1</sup> | Number of<br>homologs |
|-----------|---------------------------------|--------------------------------|--------------------------------|----------------------------------------|-----------------------|
| 0         | 1944                            | 101                            | 498                            | 2543                                   | 9                     |
| 6         | 2058                            | 63.67                          | 476.4                          | 2598.0                                 | 9                     |
| 10        | 2230                            | -                              | 455.3                          | 2685.37                                | 9                     |
| 25        | 33.44                           | -                              | -                              | 33.44                                  | 3                     |
| 50        | 37.66                           | -                              | -                              | 37.66                                  | 3                     |
| 98        | 39.24                           | -                              | -                              | 39.24                                  | 3                     |

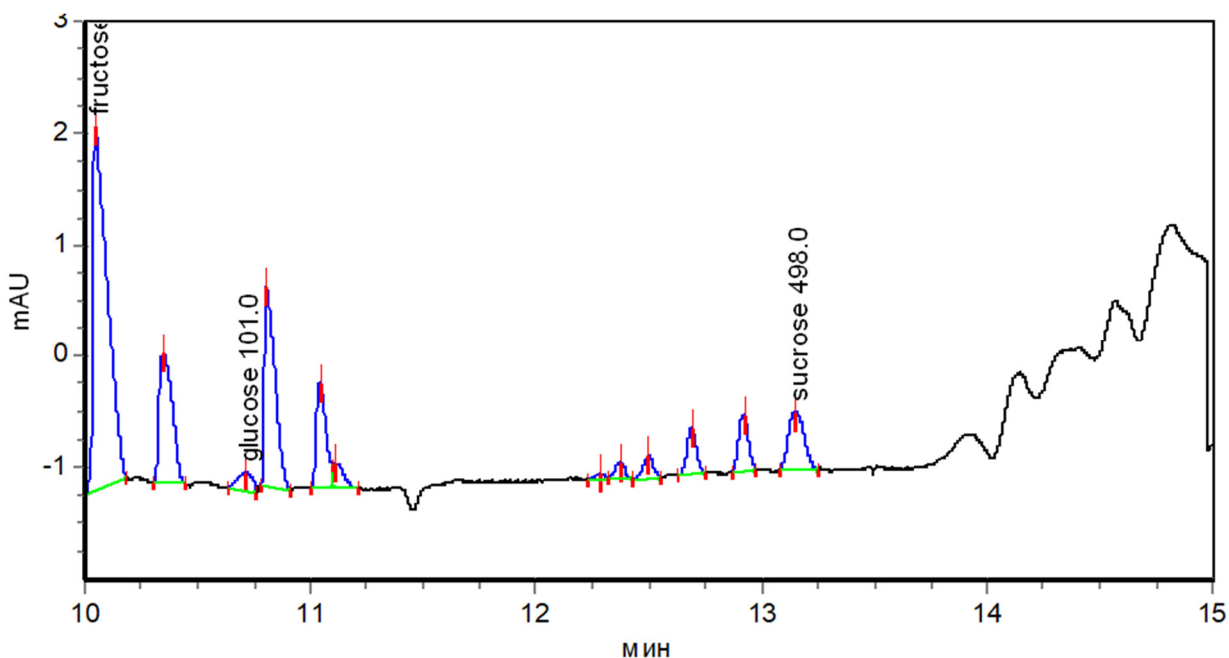

**Figure S1.** Electropherogram for the determination of oligosaccharides during cultivation of *Bifidobacterium adolescentis* at OF inlet concentration of 12 mg mL<sup>-1</sup> at 0 hours of growth.

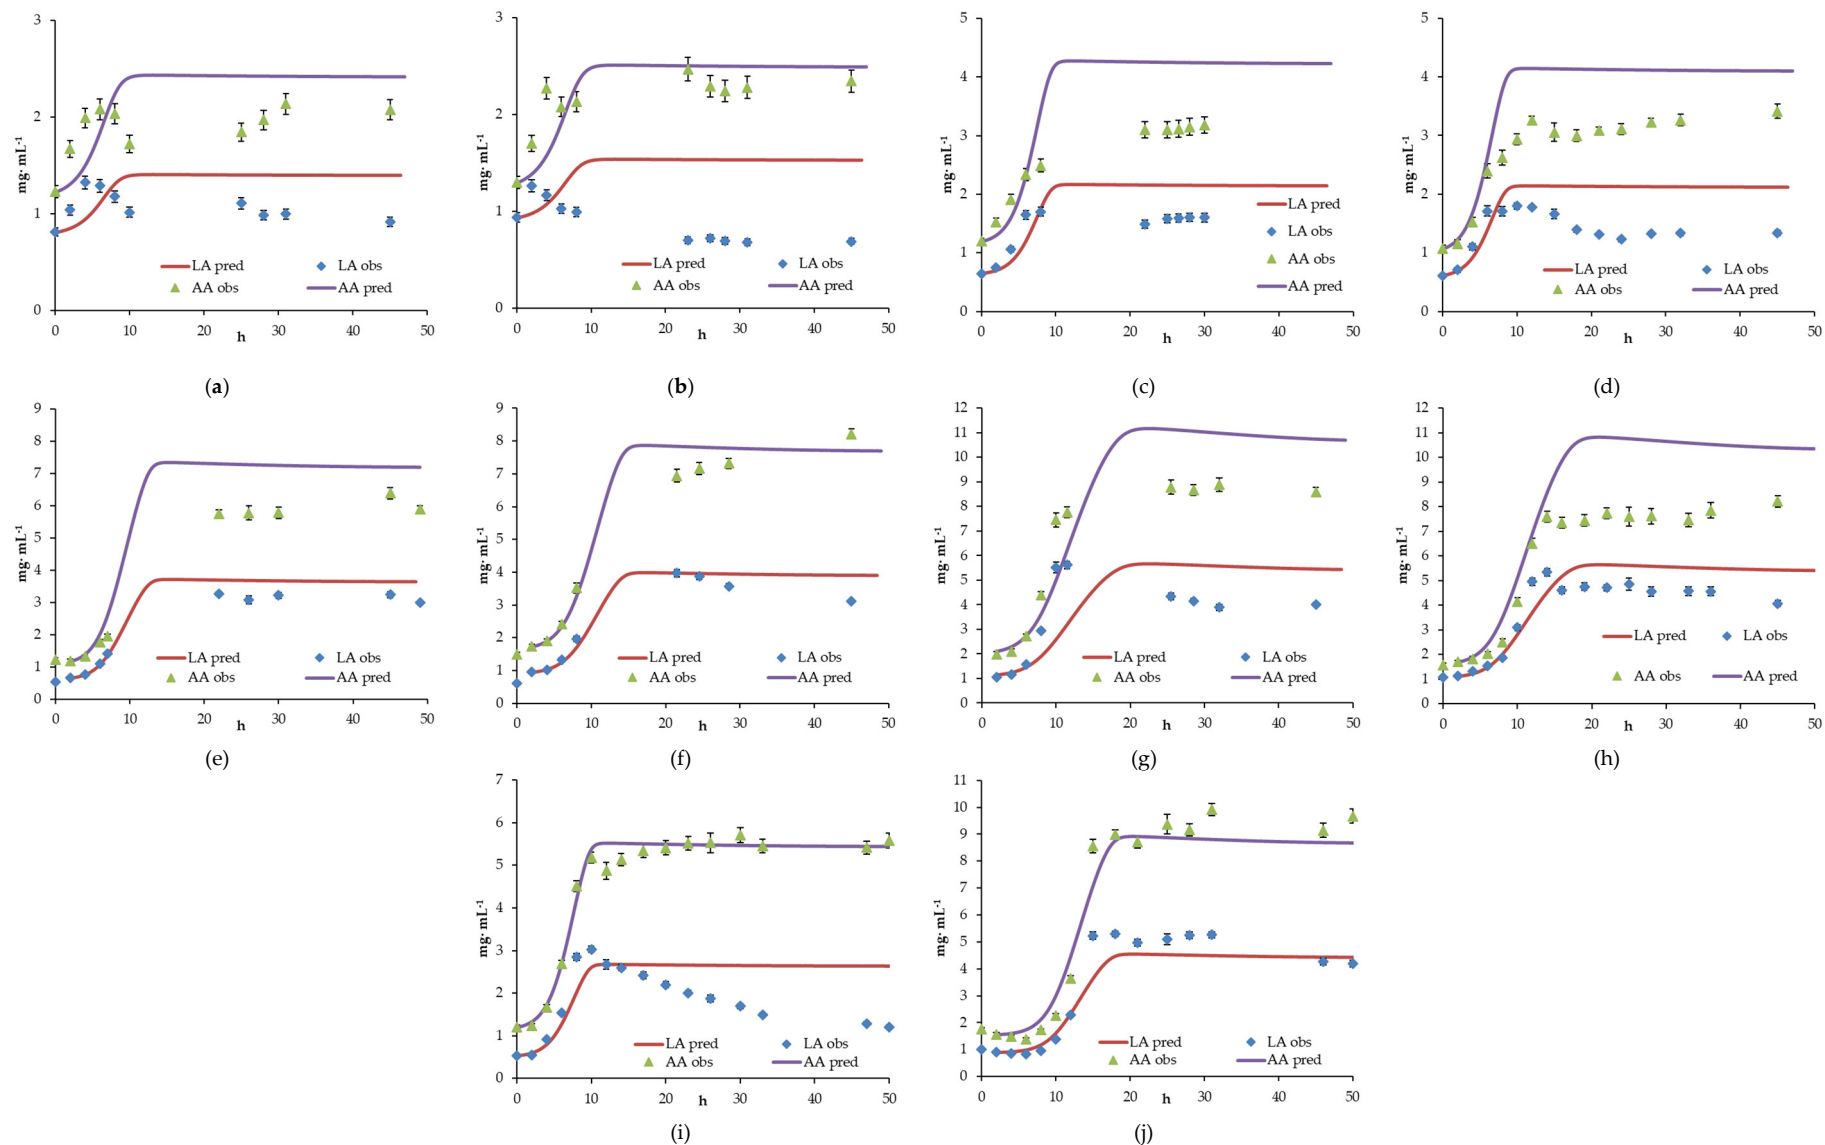

**Figure S2.** Experimentally observed ( $LA_{obs}$  and  $AA_{obs}$ ) and predicted by the model ( $LA_{pred}$  and  $AA_{pred}$ ) concentrations of lactic acid (LA) and acetic acid (AA) in the bifidobacteria monoculture under conditions simulating the distal intestine, at  $D = 0.04 \text{ h}^{-1}$  and concentrations OF 2  $\text{mg mL}^{-1}$  (a, b); 5  $\text{mg mL}^{-1}$  (c, d); 10  $\text{mg mL}^{-1}$  (e, f); 15  $\text{mg mL}^{-1}$  (g, h); 7  $\text{mg mL}^{-1}$  (i); and 12  $\text{mg mL}^{-1}$  (j).
